# Supplementary material
Source: PubMed Central journal article supplement (PMC3319219)
Supplement: supp_jc.2011-2229_11-2229_tab_1-2.pdf [file supp_jc.2011-2229_11-2229_tab_1-2.pdf]

Supplementary Table 1. Effect of metreleptin replacement therapy on glucose metabolism in the combined group of FPLD patients with severe and moderate hypoleptinemia.

| Variable                       | All subjects (n=24)            |                                |                               | P value |
|--------------------------------|--------------------------------|--------------------------------|-------------------------------|---------|
|                                | 0 mo                           | 3 mo                           | 6 mo                          |         |
| Fasting plasma glucose (mg/dL) | 111.4 ± 37.2<br>(24)           | 106.6 ± 377<br>(22)            | 101.6 ± 28.4<br>(20)          | 0.06    |
| Fasting serum insulin* (μU/mL) | 35.3<br>(20.7-91.9)<br>(11)    | 24.5<br>(18.3-43.1)<br>(12)    | 18.7<br>(17.8-28.8)<br>(9)    | 0.04    |
| Hemoglobin A1c (%)             | 6.5 ± 1.7<br>(24)              | 6.3 ± 1.8<br>(21)              | 6.5 ± 2.0<br>(19)             | 0.59    |
| K <sub>ITT</sub> (%)           | 1.02 ± 0.54<br>(20)            | 1.26 ± 0.49<br>(14)            | 1.25 ± 0.53<br>(15)           | 0.007   |
| Glucose <sub>AUC</sub> *       | 18839 ± 3385<br>(13)           | 17808 ± 3870<br>(13)           | 182221 ± 4018<br>(11)         | 0.28    |
| Insulin <sub>AUC</sub> *       | 39521<br>(19172-70095)<br>(11) | 28011<br>(16366-45879)<br>(12) | 19133<br>(14889-50852)<br>(9) | 0.03    |

P values in the last column represent the linear trend over Month 0, Month 3, and Month 6 using mixed model repeated measures analysis. Bottom numbers in parentheses indicate total number of subjects for whom the data were available.

\* measured only in those not on insulin or oral hypoglycemic therapy. Results are presented as mean ± SD or median (25<sup>th</sup> to 75<sup>th</sup> percentile).

Supplementary Table 2. Effect of leptin replacement therapy on anthropometric and metabolic variables in the combined group of FPLD patients with severe and moderate hypoleptinemia.

| Variable                         | All subjects (n=24) |                     |                     | P value |
|----------------------------------|---------------------|---------------------|---------------------|---------|
|                                  | 0 mo                | 3 mo                | 6 mo                |         |
| Body Weight (kg)                 | 66.6 ± 10.2         | 65.3 ± 10.4         | 64.3 ± 10.7         | <0.0001 |
| Body Fat (%)                     | 17.8 ± 3.2          | 15.1 ± 4.1          | 15.7 ± 3.3          | 0.0003  |
| Waist Circumference (cm)         | 81.5 ± 8.2          | 79.1 ± 6.5          | 79.4 ± 9.3          | 0.18    |
| Hip Circumference (cm)           | 91.8 ± 5.0          | 90.3 ± 5.2          | 89.8 ± 5.5          | <0.0001 |
| Waist to Hip circumference ratio | 0.89 ± 0.06         | 0.88 ± 0.05         | 0.88 ± 0.08         | 0.50    |
| Chin Skinfold (mm)               | 11.5 ± 6.1          | 9.2 ± 4.5           | 9.6 ± 5.7           | 0.18    |
| Subscapular Skinfold (mm)        | 17.1 ± 5.8          | 17.3 ± 7.0          | 16.0 ± 6.2          | 0.04    |
| Abdominal Skinfold (mm)          | 12.4 ± 5.0          | 12.4 ± 4.7          | 9.9 ± 3.6           | 0.046   |
| Hip Skinfold (mm)                | 11.8 ± 4.5          | 11.5 ± 3.3          | 11.1 ± 3.7          | 0.13    |
| Skeletal muscle mass (kg)        | 29.8 ± 4.8          | 27.0 ± 2.3          | 29.7 ± 4.9          | 0.17    |
| REE (kcal/d)                     | 1421 ± 351          | 1278 ± 234          | 1244 ± 154          | 0.003   |
| Serum leptin (ng/mL)             | 5.6<br>(4.5-7.6)    | 34.6<br>(15.2-64.9) | 48.1<br>(25.2-68.0) | <0.0001 |
| Total Cholesterol (mg/dL)        | 206 ± 59            | 193 ± 51            | 200 ± 94            | 0.31    |
| Serum Triglycerides (mg/dL)      | 287<br>(214-259)    | 227<br>(169-392)    | 210<br>(139-333)    | 0.001   |
| HDL Cholesterol (mg/dL)          | 33.7 ± 7.5          | 35.5 ± 7.4          | 34.7 ± 7.7          | 0.41    |
| Liver Fat (%)                    | 10.2<br>(5.6-23.7)  | 5.9<br>(2.3-14.6)   | 8.2<br>(1.6-19.2)   | <0.0001 |
| ALT (U/L)                        | 28.7 ± 14.3         | 25.4 ± 15.4         | 26.8 ± 20.5         | 0.10    |
| AST (U/L)                        | 25.0 ± 8.5          | 22.4 ± 8.8          | 22.0 ± 10.7         | 0.01    |

P values in the last column represent the linear trend over Month 0, Month 3, and Month 6 using mixed model repeated measures analysis. ALT, alanine aminotransferase; AST, aspartate
